# Supplementary material for: In Vitro Circadian Clock Gene Expression Assessments in Mesenchymal Stem Cells from Human Infants: A Pilot Study
Source: MDPI journal article supplement (doi:10.3390/nu16010052), 2023-12-23
Supplement: s1 [file s1]

Supplementary Material

# In Vitro Circadian Clock Gene Expression Assessments in Mesenchymal Stem Cells from Human Infants: A Pilot Study

**Supplemental Table S1.** qPCR TaqMan Gene Expression Assay Information

| Gene Target   | Taqman Assay  |
|---------------|---------------|
| <i>CLOCK</i>  | Hs00231857_m1 |
| <i>BMAL1</i>  | Hs00154147_m1 |
| <i>PER2</i>   | Hs01007553_m1 |
| <i>NR1D1</i>  | Hs00253876_m1 |
| <i>GSK3B</i>  | Hs01047719_m1 |
| <i>PPARA</i>  | Hs00947538_m1 |
| <i>SIRT1</i>  | Hs01009006_m1 |
| <i>ADIPOQ</i> | Hs02564413_s1 |
| <i>GUSB</i>   | Hs00939627_m1 |
| <i>PP1B</i>   | Hs00168719_m1 |

**Supplemental Table S2.** Antibodies for Simple Western

| Target         | Molecular Weight | Antibody             | RRID       | Antibody Dilution | Protein Concentration |
|----------------|------------------|----------------------|------------|-------------------|-----------------------|
| PPAR $\gamma$  | 53, 57           | Cell Signaling #2435 | AB_2166051 | 1:25              | 0.8 mg/ml             |
| $\beta$ -actin | 45               | Cell Signaling #4970 | AB_2223172 | 1:50              | 0.2 mg/ml             |

Supplemental Figure S1

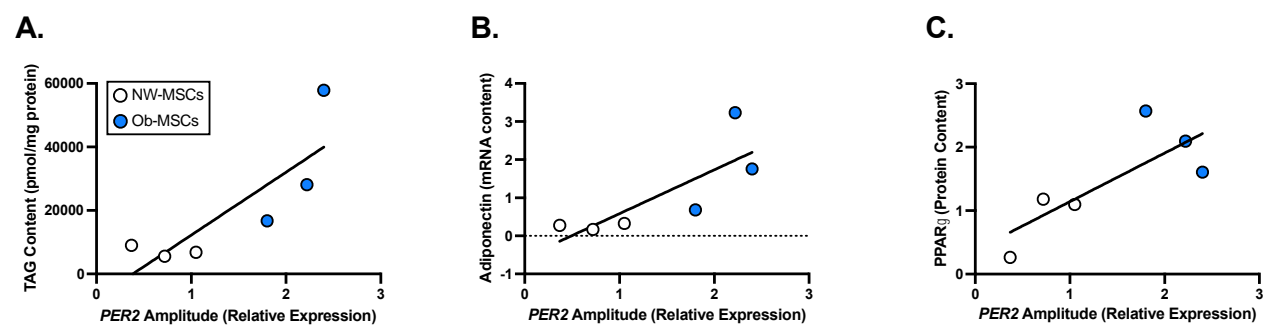

**Figure S1:** Associations between A: *PER2* amplitude and saturated TAGs during myogenesis; B: *PER2* amplitude and adiponectin during adipogenesis; and C: *PER2* amplitude and PPAR $\gamma$  during adipogenesis . NW-MSCs in open symbols and OB-MSCs in blue symbols.

Supplemental Figure S2

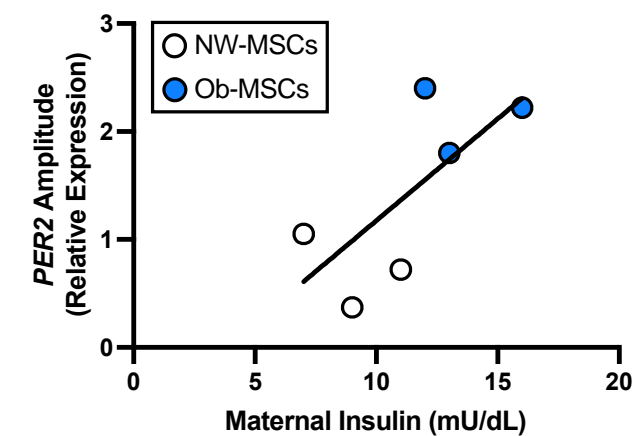

**Supplemental Figure S2:** Association between *PER2* amplitude and maternal insulin assessed during late gestation. NW-MSCs in open symbols and OB-MSCs in blue symbols.

Supplemental Figure S3

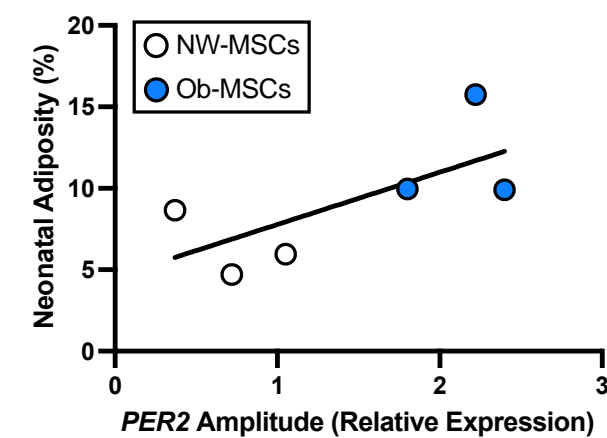

Supplemental Figure S3: Associations between *PER2* amplitude and neonatal adiposity. NW-MSCs in open symbols and OB-MSCs in blue symbols.
